# Supplementary material for: Exploring Biocontrol of Unwanted Fungi by Autochthonous Debaryomyces hansenii Strains Isolated from Dry Meat Products
Source: MDPI journal article supplement (doi:10.3390/jof8080873), 2022-08-19
Supplement: s1 [file s1]

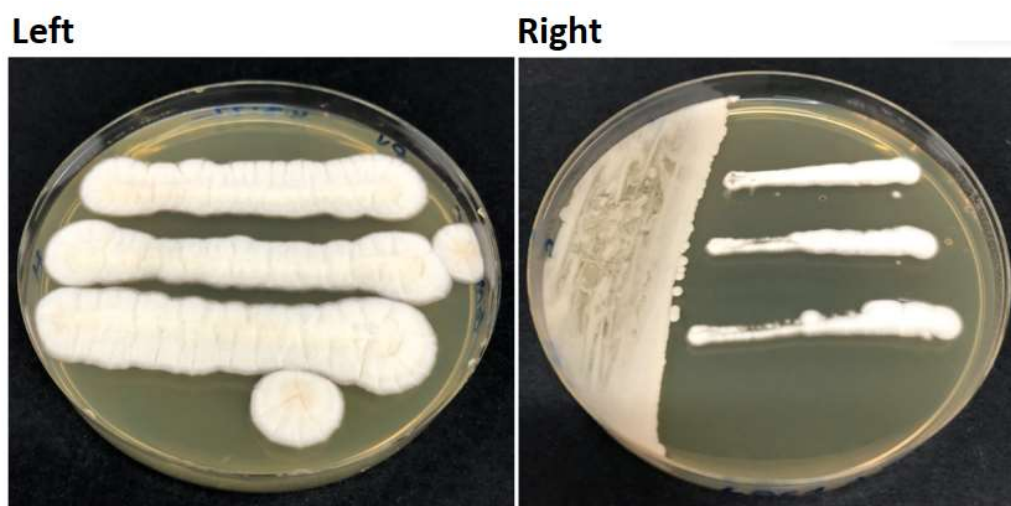

**Figure S1.** Representative photograph of the streak inhibition assay. The image on the left shows the growth of *Penicillium verrucosum* PV21 in YPDA medium without yeast and, on the right, streaks of the same fungus grown with yeast (LRC1).

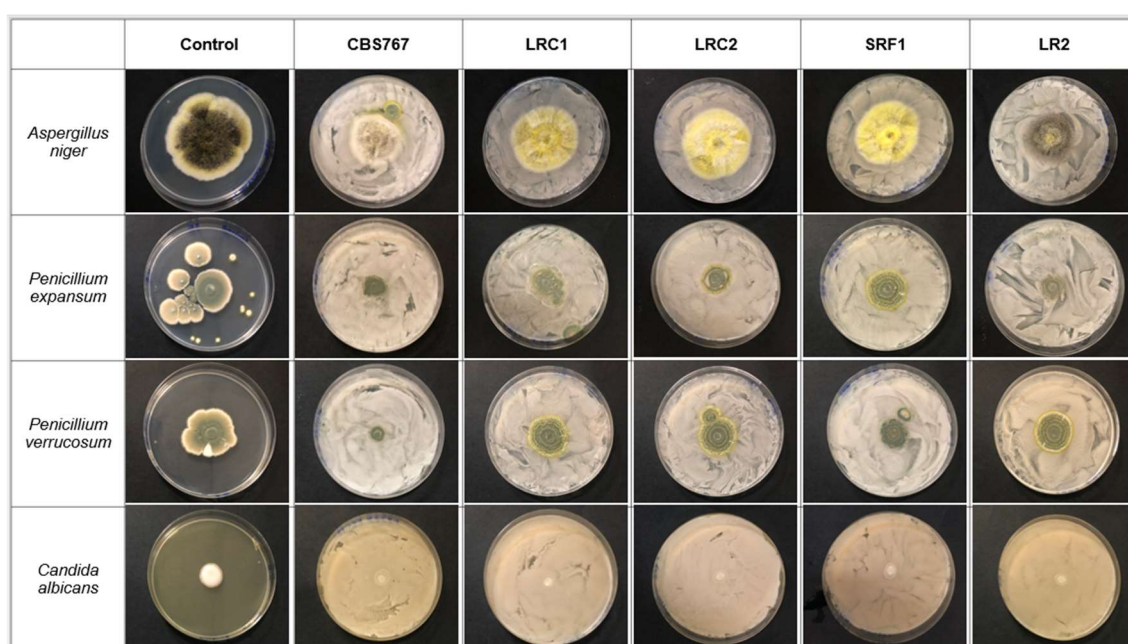

**Figure S2.** A) Representative photographs of the test of radial inhibition of potentially pathogenic fungi by different strains of *Debaryomyces hansenii*. From left to right the different strains used and, from top to bottom, the potentially pathogenic fungi under study.

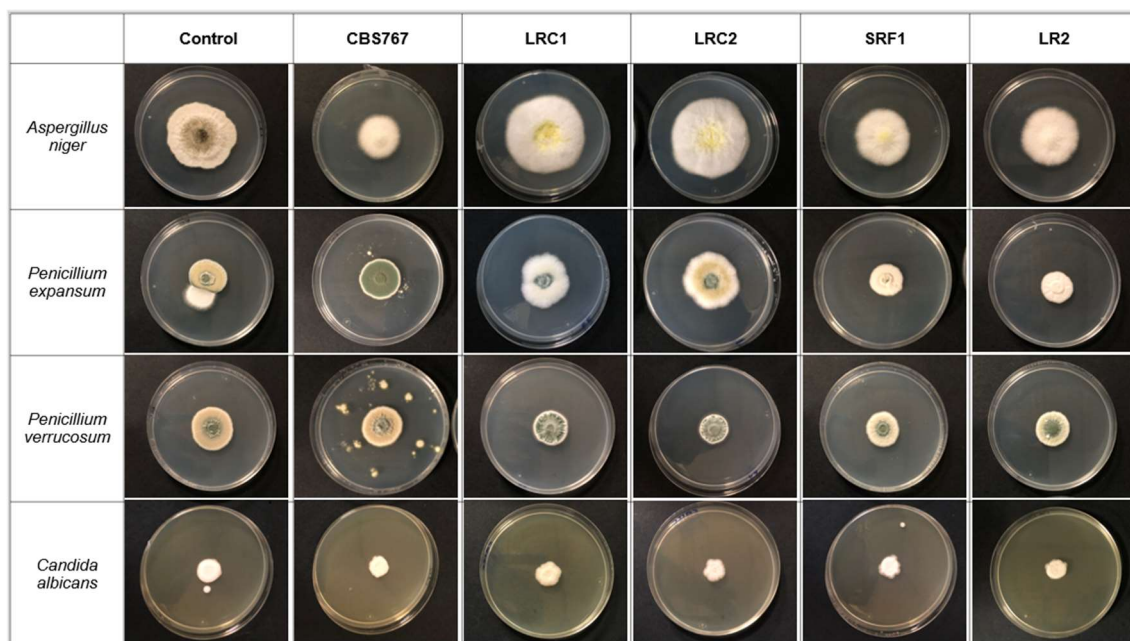

**Figure S3.** Representative photographs of the inhibition test for volatile compounds produced by *Debaryomyces hansenii* against potential pathogenic fungi. From left to right the different strains used and, from top to bottom, the potentially pathogenic fungi under study.

**Table S1.** MALDI Biotyper identification results.

| Yeasts Strains | Score Value | Matched Pattern              | NCBI Identifier |
|----------------|-------------|------------------------------|-----------------|
| CBS767         | 2.20        | <i>Debaryomyces hansenii</i> | 4959            |
| LRC1           | 2.06        | <i>Debaryomyces hansenii</i> | 4959            |
| LRC2           | 2.03        | <i>Debaryomyces hansenii</i> | 4959            |
| SRF1           | 2.03        | <i>Debaryomyces hansenii</i> | 4959            |
| LR2            | 2.12        | <i>Debaryomyces hansenii</i> | 4959            |

Meaning of score values:

0.00-1.69 No confidence microorganism identification.

1.70-1.99 Low-confidence microorganism identification.

2.00-3.00 High-confidence microorganism identification.

Table S2. Statistical analysis of the inhibitory potential of *Debaryomyces hansenii* strains. Comparison of inhibitory potential of each strain against each other for every NaCl concentration studied (0, 0.5, and 1 M). The inhibitory effect of the different *D. hansenii* strains was determined by comparing maximum mycelial growth in control (without yeast) and cocultured plates.

| Comparisons            | <i>Aspergillus niger</i> |       |     | <i>Penicillium expansum</i> |       |     | <i>Penicillium verrucosum</i> |       |     | <i>Candida albicans</i> |       |     |
|------------------------|--------------------------|-------|-----|-----------------------------|-------|-----|-------------------------------|-------|-----|-------------------------|-------|-----|
|                        | 0 M                      | 0.5 M | 1 M | 0 M                         | 0.5 M | 1 M | 0 M                           | 0.5 M | 1 M | 0 M                     | 0.5 M | 1 M |
| CBS767 <i>vs.</i> LRC1 | ns                       | *     | ns  | ns                          | ns    | ns  | ns                            | ns    | ns  | *                       | ns    | ns  |
| CBS767 <i>vs.</i> LRC2 | ***                      | ns    | ns  | ns                          | **    | ns  | **                            | ns    | **  | ***                     | ns    | ns  |
| CBS767 <i>vs.</i> SRF1 | *                        | ns    | ns  | ns                          | *     | ns  | ns                            | ns    | ns  | ns                      | ns    | ns  |
| CBS767 <i>vs.</i> LR2  | *                        | *     | ns  | ns                          | ns    | *   | **                            | ns    | *   | *                       | ns    | ns  |
| LRC1 <i>vs.</i> LRC2   | ***                      | ns    | ns  | ns                          | ns    | **  | ***                           | ns    | **  | ***                     | ns    | ns  |
| LRC1 <i>vs.</i> SRF1   | ***                      | ns    | ns  | ns                          | ns    | ns  | ns                            | ns    | ns  | ns                      | ns    | ns  |
| LRC1 <i>vs.</i> LR2    | ***                      | ns    | ns  | ns                          | ns    | ns  | **                            | ns    | *   | ns                      | ns    | ns  |
| LRC2 <i>vs.</i> SRF1   | *                        | ns    | ns  | ns                          | ns    | ns  | ns                            | ns    | **  | ***                     | ns    | ns  |
| LRC2 <i>vs.</i> LR2    | *                        | ns    | ns  | ns                          | ns    | **  | ns                            | ns    | ns  | **                      | ns    | ns  |
| SRF1 <i>vs.</i> LR2    | ns                       | ns    | ns  | ns                          | ns    | **  | ns                            | ns    | ns  | ns                      | ns    | ns  |

ns: not significant, \*  $p < 0.05$ , \*\*  $p < 0.01$ , \*\*\*  $p < 0.001$

Table S3. Statistical analysis of the effect of different NaCl concentrations on the inhibitory potential of each *Debaryomyces hansenii* strain. A comparison of inhibitory potential between NaCl concentrations studied (0, 0.5, and 1 M) for each *D. hansenii* strain. The inhibitory effect of the different *D. hansenii* strains was determined by comparing maximum mycelial growth in control (without yeast) and cocultured plates.

| Strains | Conditions (NaCl) | <i>Aspergillus niger</i> | <i>Penicillium expansum</i> | <i>Penicillium verrucosum</i> | <i>Candida albicans</i> |
|---------|-------------------|--------------------------|-----------------------------|-------------------------------|-------------------------|
| CBS767  | 0 vs. 0.5 M       | *                        | **                          | *                             | ns                      |
|         | 0 vs. 1 M         | ns                       | ns                          | ns                            | ns                      |
|         | 0.5 M vs. 1 M     | *                        | **                          | *                             | ns                      |
| LRC1    | 0 vs. 0.5 M       | *                        | ***                         | **                            | ***                     |
|         | 0 vs. 1 M         | *                        | ns                          | ns                            | ***                     |
|         | 0.5 M vs. 1 M     | ns                       | **                          | **                            | ***                     |
| LRC2    | 0 vs. 0.5 M       | ns                       | ns                          | ns                            | **                      |
|         | 0 vs. 1 M         | ns                       | **                          | *                             | ***                     |
|         | 0.5 M vs. 1 M     | ns                       | **                          | *                             | *                       |
| SRF1    | 0 vs. 0.5 M       | ns                       | **                          | ns                            | *                       |
|         | 0 vs. 1 M         | ns                       | **                          | ns                            | ns                      |
|         | 0.5 M vs. 1 M     | ns                       | ***                         | ns                            | **                      |
| LR2     | 0 vs. 0.5 M       | ns                       | *                           | ns                            | ns                      |
|         | 0 vs. 1 M         | ns                       | ns                          | ***                           | ns                      |
|         | 0.5 M vs. 1 M     | ns                       | ns                          | **                            | ns                      |

ns: not significant, \*  $p < 0.05$ , \*\*  $p < 0.01$ , \*\*\*  $p < 0.001$

**Table S4.** Statistical analysis of the radial growth assay of unwanted fungi cocultured with *Debaryomyces hansenii*. A comparison between the inhibitory activity of each strain against the control plates (without *D. hansenii*) and each other. The inhibitory activity of the different *D. hansenii* (not shown) was measured as described in the manuscript (IA). The control plates were considered to have an inhibitory activity of 0%.

| Comparisons               | <i>Aspergillus niger</i> | <i>Penicillium expansum</i> | <i>Penicillium verrucosum</i> | <i>Candida albicans</i> |
|---------------------------|--------------------------|-----------------------------|-------------------------------|-------------------------|
| Control <i>vs.</i> CBS767 | ***                      | ***                         | ***                           | ***                     |
| Control <i>vs.</i> LRC1   | *                        | ***                         | ns                            | ***                     |
| Control <i>vs.</i> LRC2   | ns                       | ***                         | ns                            | ***                     |
| Control <i>vs.</i> SRF1   | *                        | ***                         | *                             | ***                     |
| Control <i>vs.</i> LR2    | **                       | ***                         | ns                            | ***                     |
| CBS767 <i>vs.</i> LRC1    | *                        | ns                          | *                             | ns                      |
| CBS767 <i>vs.</i> LRC2    | **                       | ns                          | **                            | ns                      |
| CBS767 <i>vs.</i> SRF1    | *                        | *                           | *                             | ns                      |
| CBS767 <i>vs.</i> LR2     | ns                       | ns                          | **                            | ns                      |
| LRC1 <i>vs.</i> LRC2      | ns                       | ns                          | ns                            | ns                      |
| LRC1 <i>vs.</i> SRF1      | ns                       | ns                          | ns                            | ns                      |
| LRC1 <i>vs.</i> LR2       | *                        | ns                          | ns                            | ns                      |
| LRC2 <i>vs.</i> SRF1      | ns                       | ns                          | ns                            | ns                      |
| LRC2 <i>vs.</i> LR2       | *                        | ns                          | ns                            | ns                      |
| SRF1 <i>vs.</i> LR2       | ns                       | *                           | ns                            | ns                      |

Control: Growth of the unwanted fungi in the absence of any *D. hansenii* strain. ns: not significant, \*  $p < 0.05$ , \*\*  $p < 0.01$ , \*\*\*  $p < 0.001$
